# Supplementary material for: A microRNA cluster in the Fragile‐X region expressed during spermatogenesis targets FMR1
Source: PubMed Central journal article supplement — EMBO Rep. 2018 Dec 20;20(2):e46566. doi: 10.15252/embr.201846566 (PMC6362356; doi:10.15252/embr.201846566), 2018-12-20
Supplement: EMBR-20-e46566-s009.pdf [file EMBR-20-e46566-s009.pdf]

# Figure 3. Raw Western blot images

**E.**

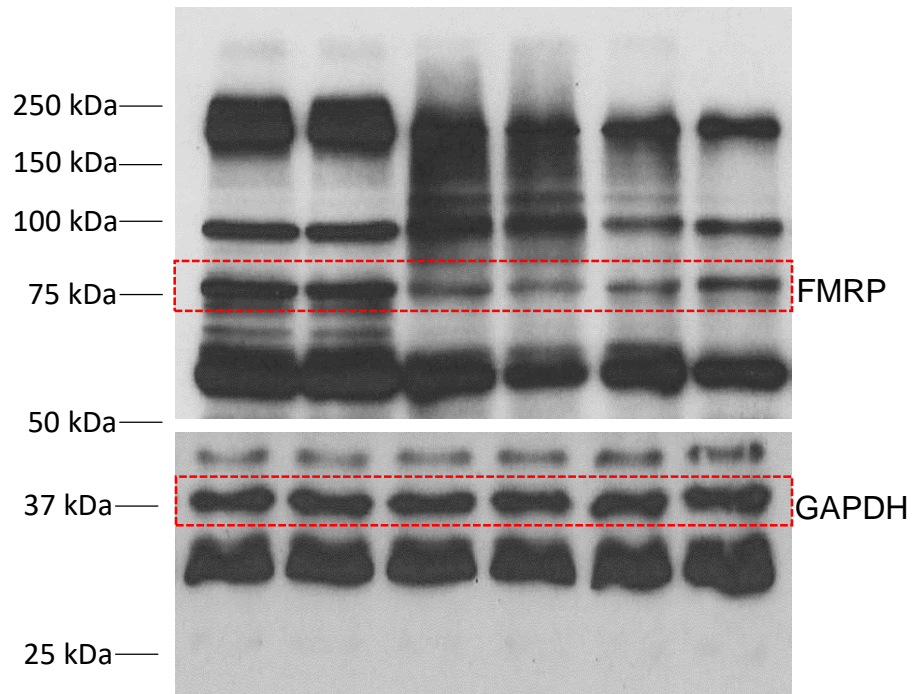

The bottom blot was incubated with both GAPDH and FMRP antibodies.
